# Supplementary material for: Response to Biologic Drugs in Patients With Rheumatoid Arthritis and Antidrug Antibodies
Source: PubMed Central journal article supplement (PMC10339150; doi:10.1001/jamanetworkopen.2023.23098), 2023-07-12
Supplement: jamanetwopen-e2323098-s001.pdf [file jamanetwopen-e2323098-s001.pdf]

## Supplemental Online Content

Bitoun S, Hässler S, Ternant D, et al; ABIRISK Consortium. Response to biologic drugs in patients with rheumatoid arthritis and antidrug antibodies. *JAMA Netw Open*. 2023;6(7):e2323098. doi:10.1001/jamanetworkopen.2023.23098

**eFigure 1.** Flow Chart

**eTable 1.** Response in ADAb Unclassified Patients

**eTable 2.** Retention Rates by Drug and Visits

**eTable 3.** Association of Therapy Response With ADAb Status at M6 (Univariate Logistic Regression)

**eTable 4.** Association of EULAR Response With Clinical and Demographic Variables at Each Visit From M6 to M15-M18 (Univariate GEE Models)

**eFigure 2.** Drug Concentration Compared Between ADAb Positive and Negative and Between Responders and Non-Responders in Etanercept-Treated Patients

**eTable 5.** Association of ADAb Status at M12 and ADAb Persistency With Methotrexate Comedication (Model 1: Univariate Logistic Regression; Model 2: Polytomous Logistic Regression)

This supplemental material has been provided by the authors to give readers additional information about their work.

**eFigure 1: Flow Chart**

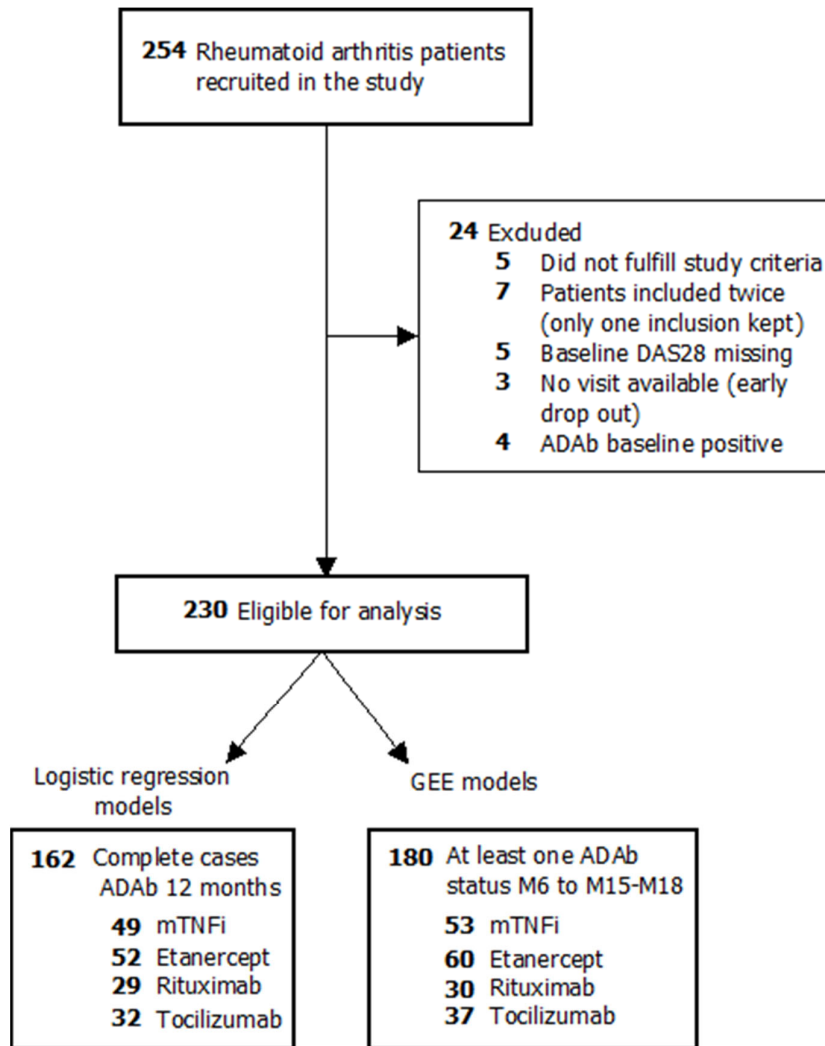

**eTable 1: Response in ADAb Unclassified Patients: n (%)**

|                                             | All bDMARDs | mTNFi     | ETN       | RTX     | TCZ       |
|---------------------------------------------|-------------|-----------|-----------|---------|-----------|
| N of ADAb overall unclassified              | 66          | 18        | 30        | 1       | 17        |
| Responders in ADAb unclassified             | 16 (24.2%)  | 4 (22.2%) | 8 (26.7%) | 0 (0%)  | 4 (23.5%) |
|                                             |             |           |           |         |           |
| N of ADAb transient/persistent unclassified | 78          | 27        | 30        | 2       | 19        |
| Responders in ADAb unclassified             | 17 (21.8%)  | 4 (14.8%) | 8 (26.7%) | 1 (50%) | 4 (21.1%) |
|                                             |             |           |           |         |           |

**eTable 2: Retention Rates by Drug and Visits**

| <b>bDMARD</b> | <b>M1</b>  | <b>M3</b> | <b>M6</b> | <b>M12</b> | <b>M15-18</b> |
|---------------|------------|-----------|-----------|------------|---------------|
| All bDMARDs   | 230 (100%) | 220 (96%) | 188 (82%) | 155 (67%)  | 93 (40%)      |
| mTNFi         | 68 (100%)  | 64 (94%)  | 55 (81%)  | 42 (62%)   | 24 (35%)      |
| Etanercept    | 82 (100%)  | 77 (94%)  | 65 (79%)  | 55 (67%)   | 33 (40%)      |
| Rituximab     | 30 (100%)  | 30 (100%) | 30 (100%) | 27 (90%)   | 10 (33%)      |
| Tocilizumab   | 50 (100%)  | 49 (98%)  | 38 (76%)  | 30 (60%)   | 25 (50%)      |

**eTable 3: Association of Therapy Response With ADAb Status at M6 (Univariate Logistic Regression)**

|                                         |          | All bDMARDs<br>N=188<br>OR (95% CI) | mTNFi<br>N=58<br>OR (95% CI) | Etanercept<br>N=63<br>OR (95% CI) | Rituximab<br>N=30<br>OR (95% CI) | Tocilizumab<br>N=37<br>OR (95% CI) |
|-----------------------------------------|----------|-------------------------------------|------------------------------|-----------------------------------|----------------------------------|------------------------------------|
| <b>Model 1 :<br/>ADAb status<br/>M6</b> | Negative | reference                           | reference                    | reference                         | reference                        | reference                          |
|                                         | Positive | <b>0.40 [0.20-0.80]</b>             | 0.50 [0.17-1.48]             | 0.35 [0.05-2.9]                   | 0.82 [0.19-3.56]                 | 0.41 [0.07-2.46]                   |

**eTable 4: Association of EULAR Response With Clinical and Demographic Variables at Each Visit From M6 to M15-M18 (Univariate GEE Models)**

| Variable                                      | p-value                    | FDR                         |
|-----------------------------------------------|----------------------------|-----------------------------|
| <b>DAS28 baseline</b>                         | <b>9.2*10<sup>-7</sup></b> | <b>1,75*10<sup>-5</sup></b> |
| <b>BMI (&lt;25 or &gt;=25 kg/m2) (visits)</b> | <b>0.0018</b>              | <b>0,0171</b>               |
| <b>RF baseline</b>                            | <b>0.0043</b>              | <b>0,02723</b>              |
| <b>Age at inclusion</b>                       | <b>0.012</b>               | <b>0,057</b>                |
| White blood cells (visits)                    | 0.015                      | 0,057                       |
| Neutrophils (visits)                          | 0.02                       | 0,06333                     |
| Familial history autoimmunity                 | 0.034                      | 0,0923                      |
| Medical and surgical history                  | 0.062                      | 0,1473                      |
| Creatinine (visits)                           | 0.12                       | 0,2533                      |
| Packyears (0,[1-15), >=15)                    | 0.2                        | 0,38                        |
| Smoke (ever/never)                            | 0.42                       | 0,7255                      |
| Smoke (No/current/quit)                       | 0.5                        | 0,7917                      |
| ALAT baseline                                 | 0.66                       | 0,9263                      |
| Lymphocytes (visits)                          | 0.74                       | 0,9263                      |
| Cigarettes per day (0,[1-10), >=10)           | 0.77                       | 0,9263                      |
| ASAT baseline                                 | 0.78                       | 0,9263                      |
| Sex                                           | 0.87                       | 0,9724                      |
| Disease duration (years)                      | 0.99                       | 1                           |
| ACPA                                          | 1                          | 1                           |

Variables with FDR<6% are shown in bold.

FDR: False discovery rate.

**eFigure 2: Drug Concentration Compared Between ADAb Positive and Negative and Between Responders and Non-Responders in Etanercept-Treated Patients**

Serum drug concentration were measured using Elisa.

- (A) Drug levels at month 1 visit for ADAb positive and negative patients. The other visits are not shown because all patients were ADAb negative after month 1.
- (B) Drug levels at each visit for EULAR responder and non-responder patients.

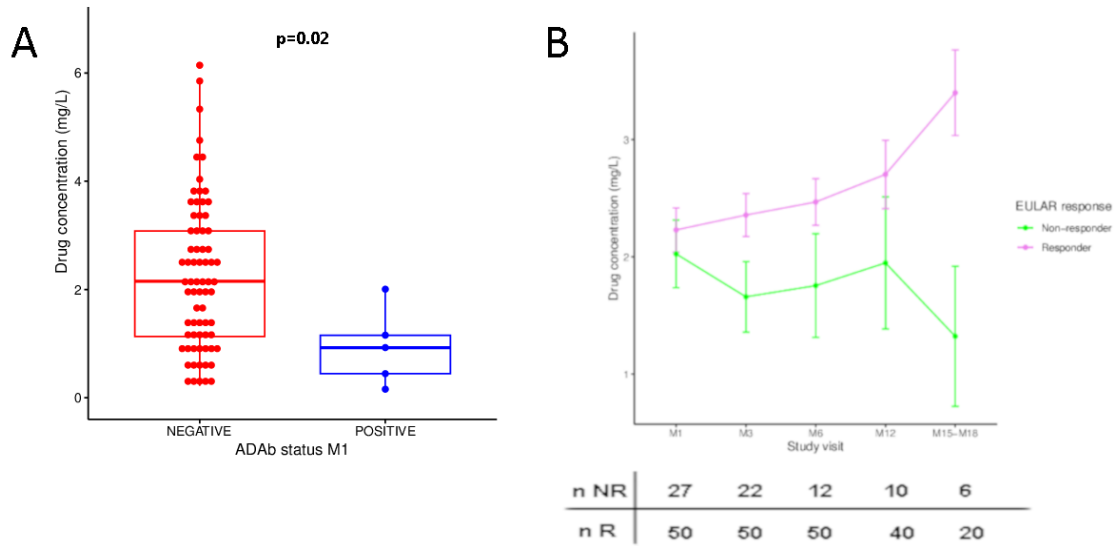

**eTable 5: Association of ADAb Status at M12 and ADAb Persistency With Methotrexate Comedication (Model 1: Univariate Logistic Regression; Model 2: Polytomous Logistic Regression).**

Etanercept was not analyzed in model 2 because no persistent ADAb were developed by etanercept-treated patients.

|                                                                   |                             | All bDMARDs<br>N=165                       |                                  | mTNFi<br>N=50           |                         | Etanercept<br>N=52 | Rituximab<br>N=29                                                |                         | Tocilizumab<br>N=34     |                         |
|-------------------------------------------------------------------|-----------------------------|--------------------------------------------|----------------------------------|-------------------------|-------------------------|--------------------|------------------------------------------------------------------|-------------------------|-------------------------|-------------------------|
|                                                                   | <b>MTX<br/>comedication</b> | OR (95% CI)                                |                                  | OR (95% CI)             |                         | OR (95% CI)        | OR (95% CI)                                                      |                         | OR (95% CI)             |                         |
| <b>Model 1 :<br/>ADAb<br/>status M12</b>                          | No                          | reference                                  |                                  | reference               |                         | reference          | reference                                                        |                         | reference               |                         |
|                                                                   | Yes                         | <b>0.50 [0.25-1.00]</b>                    |                                  | <b>0.23 [0.06-0.87]</b> |                         | 0.51 [0.08-3.46]   | 0.8 [0.16-3.88]                                                  |                         | 1.05 [0.17-6.60]        |                         |
|                                                                   |                             |                                            |                                  |                         |                         |                    |                                                                  |                         |                         |                         |
|                                                                   |                             | All bDMARDs<br>(no<br>Etanercept)<br>N=101 |                                  | mTNFi<br>N=41           |                         | Etanercept<br>NA   | Rituximab<br>N=28                                                |                         | Tocilizumab<br>N=32     |                         |
|                                                                   |                             | OR<br>(95%<br>CI)                          | OR<br>(95%<br>CI)                | OR<br>(95%<br>CI)       | OR<br>(95%<br>CI)       | OR (95% CI)        | OR<br>(95%<br>CI)                                                | OR<br>(95%<br>CI)       | OR<br>(95% CI)          | OR<br>(95% CI)          |
|                                                                   | <b>MTX<br/>comedication</b> | trans<br>vs neg                            | pers<br>vs neg                   | trans<br>vs neg         | pers<br>vs neg          | NA                 | trans<br>vs neg                                                  | pers<br>vs neg          | trans vs<br>neg         | pers<br>vs neg          |
| <b>Model 2 :<br/>ADAb<br/>transient or<br/>persistent<br/>M12</b> | No                          | refer.                                     | refer.                           | refer.                  | refer.                  | NA                 | refer.                                                           | refer.                  | refer.                  | reference               |
|                                                                   | Yes                         | 0.88<br>[0.21-<br>3.69]                    | <b>0.36<br/>[0.13-<br/>0.97]</b> | 0.30<br>[0.04-<br>2.42] | 0.28<br>[0.06-<br>1.35] | NA                 | 3699<br>[0.9*1<br>0 <sup>-34</sup> -<br>1.5*10 <sup>4</sup><br>0 | 0.32<br>[0.05-<br>1.85] | 0.53<br>[0.04-<br>7.05] | 1.05<br>[0.09-<br>11.6] |
