# Supplementary material for: Response to Biologic Drugs in Patients With Rheumatoid Arthritis and Antidrug Antibodies
Source: PubMed Central journal article supplement (PMC10339150; doi:10.1001/jamanetworkopen.2023.23098), 2023-07-12
Supplement: jamanetwopen-e2323098-s002.pdf [file jamanetwopen-e2323098-s002.pdf]

\*First name, last name, and suffix (if applicable) are required and will appear in PubMed.

| <b>*Group Name(s): ABIRISK Consortium</b> |                   |                              |                  |                           |                                          |                                                         |                                                                                            |
|-------------------------------------------|-------------------|------------------------------|------------------|---------------------------|------------------------------------------|---------------------------------------------------------|--------------------------------------------------------------------------------------------|
| <b>*First Name and Middle Initial(s)</b>  | <b>*Last Name</b> | <b>*Suffix (eg, Jr, III)</b> | Academic Degrees | Institution               | Location (city, state/province, country) | Role or Contribution, eg, chair, principal investigator | Group (if more than 1 Group listed in the byline) and/or Subgroup (eg, Steering Committee) |
| Francis                                   | Berenbaum         |                              | Prof, MD, PhD    | AP-HP.Sorbonne Université | Paris, France                            | Coinvestigator                                          |                                                                                            |
| Philippe                                  | Dieudé            |                              | Prof, MD, PhD    | AP-HP CHU Bichat          | Paris, France                            | Coinvestigator                                          |                                                                                            |
| Philippe                                  | Bertin            |                              | Prof, MD         | CHU Limoges               | Limoges, France                          | Coinvestigator                                          |                                                                                            |
| Maxime                                    | Dougados          |                              | Prof, MD, PhD    | CHU Cochin                | Paris, France                            | Coinvestigator                                          |                                                                                            |
| Corinne                                   | Miceli            |                              | Prof, MD, PhD    | CHU Cochin                | Paris, France                            | Coinvestigator                                          |                                                                                            |
| Aleth                                     | Pedriger          |                              | Prof, MD         | CHU Rennes                | Rennes, France                           | Coinvestigator                                          |                                                                                            |
| Hubert                                    | Marotte           |                              | Prof, MD, PhD    | CHU St Etienne            | St Etienne, France                       | Coinvestigator                                          |                                                                                            |
| Alain                                     | Cantagrel         |                              | Prof, MD         | CHU Toulouse              | Toulouse, France                         | Coinvestigator                                          |                                                                                            |
| Olivier                                   | Vittecoq          |                              | Prof, MD, PhD    | CHU Rouen                 | Rouen, France                            | Coinvestigator                                          |                                                                                            |
| Thierry                                   | Lequere           |                              | Prof, MD, PhD    | CHU Rouen                 | Rouen, France                            | Coinvestigator                                          |                                                                                            |
| Alain                                     | Saraux            |                              | Prof, MD, PhD    | CHU Brest                 | Brest , France                           | Coinvestigator                                          |                                                                                            |
| René-Marc                                 | Flipo             |                              | Prof, MD         | CHU Lille                 | Lille, France                            | Coinvestigator                                          |                                                                                            |
| Jean                                      | Sibilia           |                              | Prof, MD         | CHU Strasbourg            | Strasbourg, France                       | Coinvestigator                                          |                                                                                            |

## Supplemental Online Content: Nonauthor Collaborators

\*First name, last name, and suffix (if applicable) are required and will appear in PubMed.

| *First Name and Middle Initial(s) | *Last Name   | *Suffix (eg, Jr, III) | Academic Degrees | Institution                       | Location (city, state/province, country) | Role or Contribution, eg, chair, principal investigator | Group (if more than 1 Group listed in the byline) and/or Subgroup (eg, Steering Committee) |
|-----------------------------------|--------------|-----------------------|------------------|-----------------------------------|------------------------------------------|---------------------------------------------------------|--------------------------------------------------------------------------------------------|
| Jacques Eric                      | Gottenberg   |                       | Prof, MD, PhD    | CHU Strasbourg                    | Strasbourg, France                       | Coinvestigator                                          |                                                                                            |
| Bernard                           | Combe        |                       | Prof, MD         | CHU Montpellier                   | Montpellier, France                      | Coinvestigator                                          |                                                                                            |
| Jacques                           | Morel        |                       | Prof, MD, PhD    | CHU Montpellier                   | Montpellier, France                      | Coinvestigator                                          |                                                                                            |
| Daniel                            | Wendling     |                       | Prof, MD         | CHU Besançon                      | Besançon, France                         | Coinvestigator                                          |                                                                                            |
| Carin                             | Verhoef      |                       | MD               | Flevoziekenhuis Almere            | Almere, The Netherlands                  | Coinvestigator                                          |                                                                                            |
| Martin                            | van Rijswijk |                       | MD               | Academisch Ziekenhuis             | Groningen, The Netherlands               | Coinvestigator                                          |                                                                                            |
| Mike                              | Nurmohamed   |                       | Prof, MD, PhD    | Amsterdam UMC                     | Amsterdam, The Netherlands               | Coinvestigator                                          |                                                                                            |
| Alessandra                        | Vultaggio    |                       | Prof, MD, PhD    | Azienda Ospedaliero Universitaria | Florence, Italy                          | Coinvestigator                                          |                                                                                            |
