# Supplementary material for: Response to Biologic Drugs in Patients With Rheumatoid Arthritis and Antidrug Antibodies
Source: PubMed Central journal article supplement (PMC10339150; doi:10.1001/jamanetworkopen.2023.23098), 2023-07-12
Supplement: jamanetwopen-e2323098-s003.pdf [file jamanetwopen-e2323098-s003.pdf]

## Data Sharing Statement

Bitoun. Response to Biologic Drugs in Patients With Rheumatoid Arthritis and Antidrug Antibodies. *JAMA Netw Open*. Published July 12, 2023.

doi:10.1001/jamanetworkopen.2023.23098

### Data

**Data available:** Yes

**Data types:** Deidentified participant data

**How to access data:** request for data do Dr Signe Hassler signe.hassler@sorbonne-universite.fr

**When available:** With publication

### Supporting Documents

**Document types:** None

### Additional Information

**Who can access the data:** Data will be available to researchers whose proposed use of the data has been approved by the scientific committee of the ABIRISK consortium

**Types of analyses:** For any purpose concerning improvement of knowledge concerning treatment of rheumatoid arthritis

**Mechanisms of data availability:** data will be made available after approval of a proposal by the scientific committee of the ABIRISK consortium

**Any additional restrictions:** None
